# Supplementary material for: A Microfluidic DNA Sensor Based on Three-Dimensional (3D) Hierarchical MoS2/Carbon Nanotube Nanocomposites
Source: Sensors (Basel). 2016 Nov 14;16(11):1911. doi: 10.3390/s16111911 (PMC5134570; doi:10.3390/s16111911)
Supplement: Supplementary file 1 [file sensors-16-01911-s001.pdf]

# Supplementary Materials: A Microfluidic DNA Sensor Based on Three-Dimensional (3D) Hierarchical MoS<sub>2</sub>/Carbon Nanotube Nanocomposites

Dahou Yang, Mahnoush Tayebi, Yinxi Huang, Hui Ying Yang and Ye Ai

The scanning electron microscopy (SEM) of pristine multi-walled nanotubes (MWNTs) used in the experiments is shown in Figure S1. The outer diameter of the multi-walled carbon nanotubes (MWCNTs) range from 20 to 60 nm with a length of 5 to 15  $\mu\text{m}$ . MoS<sub>2</sub> is extended the layered structure out of the cylindrical tubules, which is different from MoS<sub>2</sub> sheath/CNT-core nanoarchitecture where MoS<sub>x</sub> layers are confined to the MWCNTs [1].

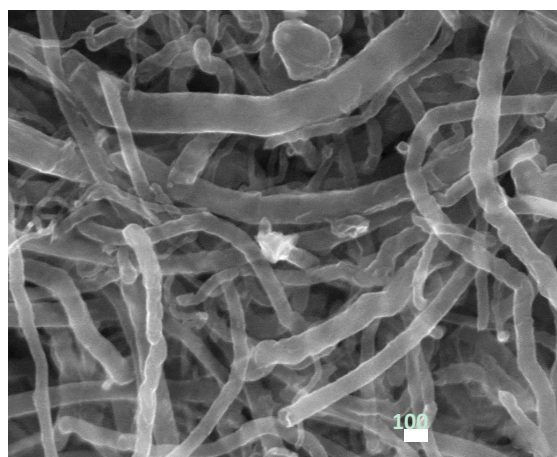

**Figure S1.** Scanning electron microscopy (SEM) image of pristine multi-walled nanotubes (MWNTs).

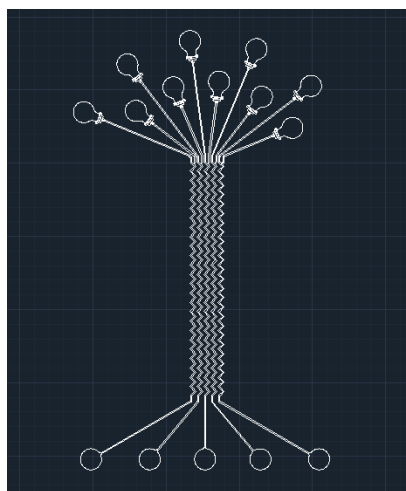

**Figure S2.** Channel geometry of the polydimethylsiloxane (PDMS) microfluidic device. The microchannel height is 40  $\mu\text{m}$  and width is 100  $\mu\text{m}$ .

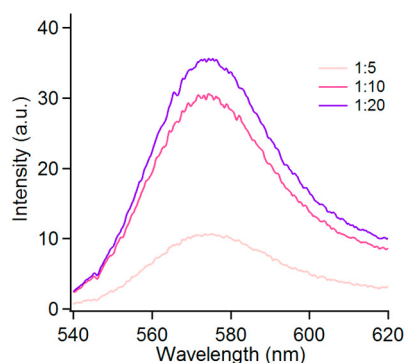

**Figure S3.** Fluorescence spectra of P1 (100 nM) in the presence of different ratios of MoS<sub>2</sub>/MWCNT (1:5, 1:10, and 1:20). The concentrations of the different MoS<sub>2</sub>/MWCNT ratios are all 150 µg/mL.

**Table S1.** DNA detection performance of existing MoS<sub>2</sub>-based biosensors.

| Sensor                                                                                      | Description                                                                                                                                             | Linear Range (nM)     | LOD (nM)                 | Reference |
|---------------------------------------------------------------------------------------------|---------------------------------------------------------------------------------------------------------------------------------------------------------|-----------------------|--------------------------|-----------|
| MoS <sub>2</sub> nanosheets                                                                 | Using the fluorescence quenching ability of MoS <sub>2</sub> nanosheets toward the dye-labeled ssDNA was investigated in the zigzag-shaped microchannel | 0–50                  | 0.5                      | [2]       |
| MoS <sub>2</sub> nanosheets                                                                 | Using the fluorescence quenching ability of MoS <sub>2</sub> nanosheets toward the dye-labeled biomolecules was investigated in bulk samples            | 0–15                  | 0.5                      | [3]       |
| PL measurements of graphene/MoS <sub>2</sub> film                                           | Photoluminescence mappings for the graphene/MoS <sub>2</sub> stack film immobilized with the probe DNA                                                  | 0–0.000001            | 0.001 × 10 <sup>-6</sup> | [4]       |
| MoS <sub>2</sub> -based method for DNA detection using hybridization chain reactions (HCRs) | MoS <sub>2</sub> is used to reduce the background signal and HCRs are employed to amplify the fluorescence emission                                     | 0–0.2                 | 0.015                    | [5]       |
| Few-layer MoS <sub>2</sub> nanosheets                                                       | Electrical detection of DNA by (2D) few-layer MoS <sub>2</sub> as a sensing-channel                                                                     | -                     | 0.00001                  | [6]       |
| MoS <sub>2</sub> and WS <sub>2</sub> nanoflakes                                             | Fluorescence detection of nucleic acids, based on a signal-on sensing approach                                                                          | 9.60–366              | 9.60                     | [7]       |
| GOD/AuNPs/MoS <sub>2</sub> /MWCN Ts/GCE                                                     | For DNA sensing, cyclic voltammetry (CV) was carried out                                                                                                | 0.00001–10            | 79 × 10 <sup>-8</sup>    | [8]       |
| CdS/MoS <sub>2</sub>                                                                        | Photoelectrochemical biosensor                                                                                                                          | 10 <sup>-6</sup> –0.1 | 0.39 × 10 <sup>-6</sup>  | [9]       |
| MoS <sub>2</sub> /MWCNT                                                                     | Fluorescence quenching                                                                                                                                  | 0–50                  | 1                        | This Work |

## Reference

- Wang, Q.; Li, J. Facilitated lithium storage in MoS<sub>2</sub> overlayers supported on coaxial carbon nanotubes. *J. Phys. Chem. C* **2007**, *111*, 1675–1682.
- Huang, Y.; Shi, Y.; Yang, H.Y.; Ai, Y. A novel single-layered MoS<sub>2</sub> nanosheet based microfluidic biosensor for ultrasensitive detection of DNA. *Nanoscale* **2015**, *7*, 2245–2249.
- Zhu, C.; Zeng, Z.; Li, H.; Li, F.; Fan, C.; Zhang, H. Single-layer MoS<sub>2</sub>-based nanoprobe for homogeneous detection of biomolecules. *J. Am. Chem. Soc.* **2013**, *135*, 5998–6001.
- Chen, C.-H. Label-Free Detection of DNA Hybridization on MoS<sub>2</sub> Using Photoluminescence Measurements. In Proceedings of the 9th IEEE International Conference on Nano/Molecular Medicine & Engineering (NANOMED), Honolulu, HI, USA, 15–18 November 2015; pp. 196–199.
- Huang, J.; Ye, L.; Gao, X.; Li, H.; Xu, J.; Li, Z. Molybdenum disulfide-based amplified fluorescence DNA detection using hybridization chain reactions. *J. Mater. Chem. B* **2015**, *3*, 2395–2401.
- Lee, D.-W.; Lee, J.; Sohn, I.Y.; Kim, B.-Y.; Son, Y.M.; Bark, H.; Jung, J.; Choi, M.; Kim, T.H.; Lee, C. Field-effect transistor with a chemically synthesized MoS<sub>2</sub> sensing channel for label-free and highly sensitive electrical detection of DNA hybridization. *Nano Res.* **2015**, *8*, 2340–2350.
- Loo, A.H.; Bonanni, A.; Pumera, M. Strong dependence of fluorescence quenching on the transition metal in layered transition metal dichalcogenide nanoflakes for nucleic acid detection. *Analyst* **2016**, *141*, 4654–4658.

8. Huang, K.-J.; Liu, Y.-J.; Wang, H.-B.; Wang, Y.-Y.; Liu, Y.-M. Sub-femtomolar DNA detection based on layered molybdenum disulfide/multi-walled carbon nanotube composites, au nanoparticle and enzyme multiple signal amplification. *Biosens. Bioelectron.* **2014**, *55*, 195–202.
9. Zang, Y.; Lei, J.; Hao, Q.; Ju, H. Cds/MoS<sub>2</sub> heterojunction-based photoelectrochemical DNA biosensor via enhanced chemiluminescence excitation. *Biosens. Bioelectron.* **2016**, *77*, 557–564.
